# Supplementary material for: Colored semitransparent polymer solar cells with a power conversion efficiency of 9.36% achieved by controlling the optical Tamm state
Source: Royal Society of Chemistry journal article supplement (doi:10.1039/c9ta00227h), 2019-01-01
Supplement: c9ta00227h1.pdf [file c9ta00227h1.pdf]

## Supporting Information

### Colored Semitransparent Polymer Solar Cells with Power Conversion Efficiency of 9.36 % by Controlling Optical Tamm State

Ping Shen,<sup>a</sup> Mengnan Yao,<sup>a</sup> Junshi Liu,<sup>a</sup> Yongbing Long,<sup>\*b</sup> Wenbin Guo,<sup>a</sup>  
Liang Shen<sup>\*a</sup>

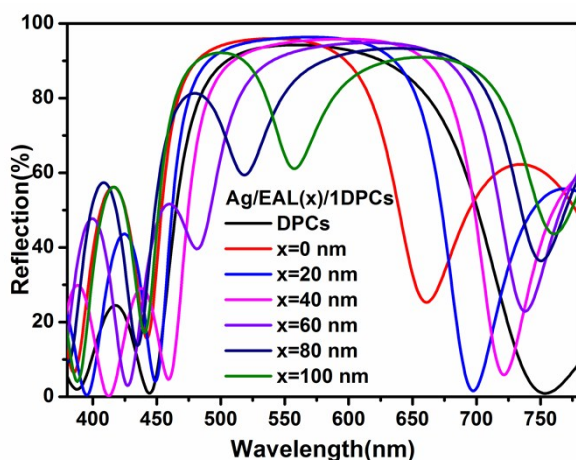

Fig. S1 Simulated reflection of Ag/EAL/1DPCs by TMM.

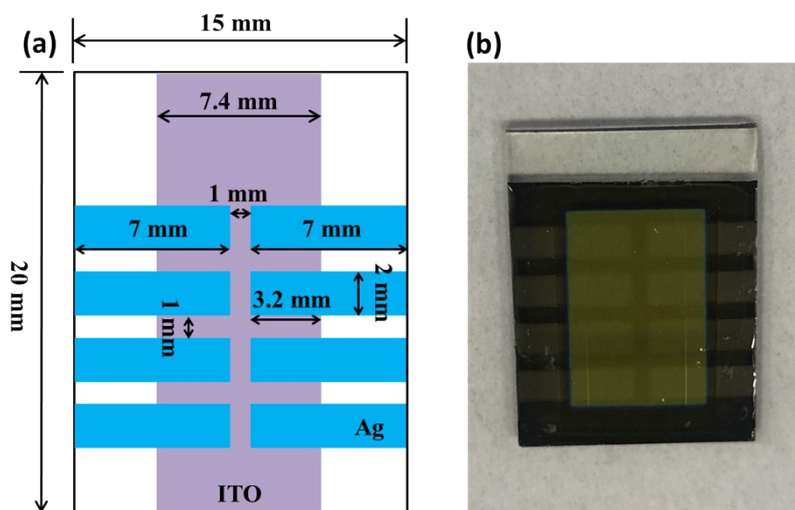

Fig. S2 (a) The sketch map of glass substrate with detail sizes and active area of the eight cells; (b) the picture of real ST-PSCs with EAL and 1DPCs.

Table S1: Summary of some representative ST-PSCs performance including device structure,

PCE and AVT

| Device Structure                                                                                                                                                                                                               | PCE (%) | AVT (%) | Ref.      |
|--------------------------------------------------------------------------------------------------------------------------------------------------------------------------------------------------------------------------------|---------|---------|-----------|
| ITO/PFN/PTB7-Th:PC <sub>71</sub> BM/MoO <sub>3</sub> /Ag /EAL/[WO <sub>3</sub> /LiF] <sup>5</sup>                                                                                                                              | 9.36    | 14.31   | This work |
| ITO/ZnO/C <sub>60</sub> -SAM/PBDTTT-C-T:PC <sub>71</sub> BM/MoO <sub>3</sub> /Ag                                                                                                                                               | 6       | 25      | 11        |
| Glass/graphene/PEDOT:PSS/ZnO-NP/PTB7:PC <sub>71</sub> BM/PEDOT:PSS/Graphene                                                                                                                                                    | 3.4     | 40      | 15        |
| ITO/ZnO/PTB7-Th:FOIC/MoO <sub>3</sub> /Au/Ag                                                                                                                                                                                   | 10.3    | 37.4    | 22        |
| ITO/ZnO/PTB7-Th:PC <sub>71</sub> BM/MoO <sub>3</sub> /(Au/Ag)/[MoO <sub>3</sub> /LiF] <sup>6</sup>                                                                                                                             | 7.0     | 12.2    | 28        |
| ITO/PFN/PTB7-Th:PC <sub>71</sub> BM/MoO <sub>3</sub> /Ag+Au NPs/Ag/ photonic crystal                                                                                                                                           | 7.07    | 20.38   | 29        |
| ITO/C <sub>60</sub> :NDNI/C <sub>60</sub> /F4-ZnPc:C <sub>60</sub> /DiNPB/DiNPB:NDP9/C <sub>60</sub> :NDN1/C <sub>60</sub><br>/DCV6T:C <sub>60</sub> /BPAPF/BPAPF:NDP9/DiNPB:NDP9/C <sub>60</sub> :NDN1/Al/Ag/Alq <sub>3</sub> | 4.9     | 24      | 42        |
| PET/ITO/TiO <sub>2</sub> /C <sub>60</sub> -SAM/PSEHTT:ICBA/PANI/Ag                                                                                                                                                             | 6.87    | 36      | 43        |
| ITO/ZnO/PBDTT-DPP:PC <sub>71</sub> BM/MoO <sub>3</sub> /Ag/Si NPs/Alq <sub>3</sub>                                                                                                                                             | 6.22    | 32      | 44        |
| ITO/PEDOT:PSS/BDTT-S-TR:PC <sub>71</sub> BM/ZnO/PDINO/AgNW                                                                                                                                                                     | 3.62    | ~30     | 45        |
| ITO/TiO <sub>2</sub> /PCDTBT:PC <sub>71</sub> BM/WO <sub>3</sub> /Ag/photonic crystal                                                                                                                                          | 5.31    | 25.1    | 46        |
| ITO/PEDOT:PSS/PTB7:PC <sub>71</sub> BM/bathocuproine (BCP)/<br>Ag/LiF/non-periodic photonic crystal                                                                                                                            | 5.6     | 30      | 47        |
| ITO/ZnO/PTB7-Th:ATT-2/MoO <sub>3</sub> /Ag                                                                                                                                                                                     | 7.7     | 37      | 48        |
| ITO/PEDOT:PSS /PTB7-Th:IEICO-4Cl/PFN-Br/Au                                                                                                                                                                                     | 8.38    | 25.7    | 49        |
| ITO/ZnO/PTB7-Th:IHIC/MoO <sub>3</sub> /Au/Ag                                                                                                                                                                                   | 9.77    | 36      | 50        |
